# Supplementary material for: Deposits from giant floods in Gale crater and their implications for the climate of early Mars
Source: PubMed Central journal article supplement (PMC7645609; doi:10.1038/s41598-020-75665-7), 2020-11-05
Supplement: 41598_2020_75665_MOESM9_ESM.pdf [file 41598_2020_75665_MOESM9_ESM.pdf]

Supplemental Figure 9

Deposits from Giant Floods in Gale Crater and Their Implications for the Climate of Early Mars

E. Heydari (1)\*, J. F. Schroeder (2), F. J. Calef (2), J. Van Beek (2), S. K. Rowland (3), and T. J. Parker (2), A. G. Fairén (4)

Supplementary Figure 9:

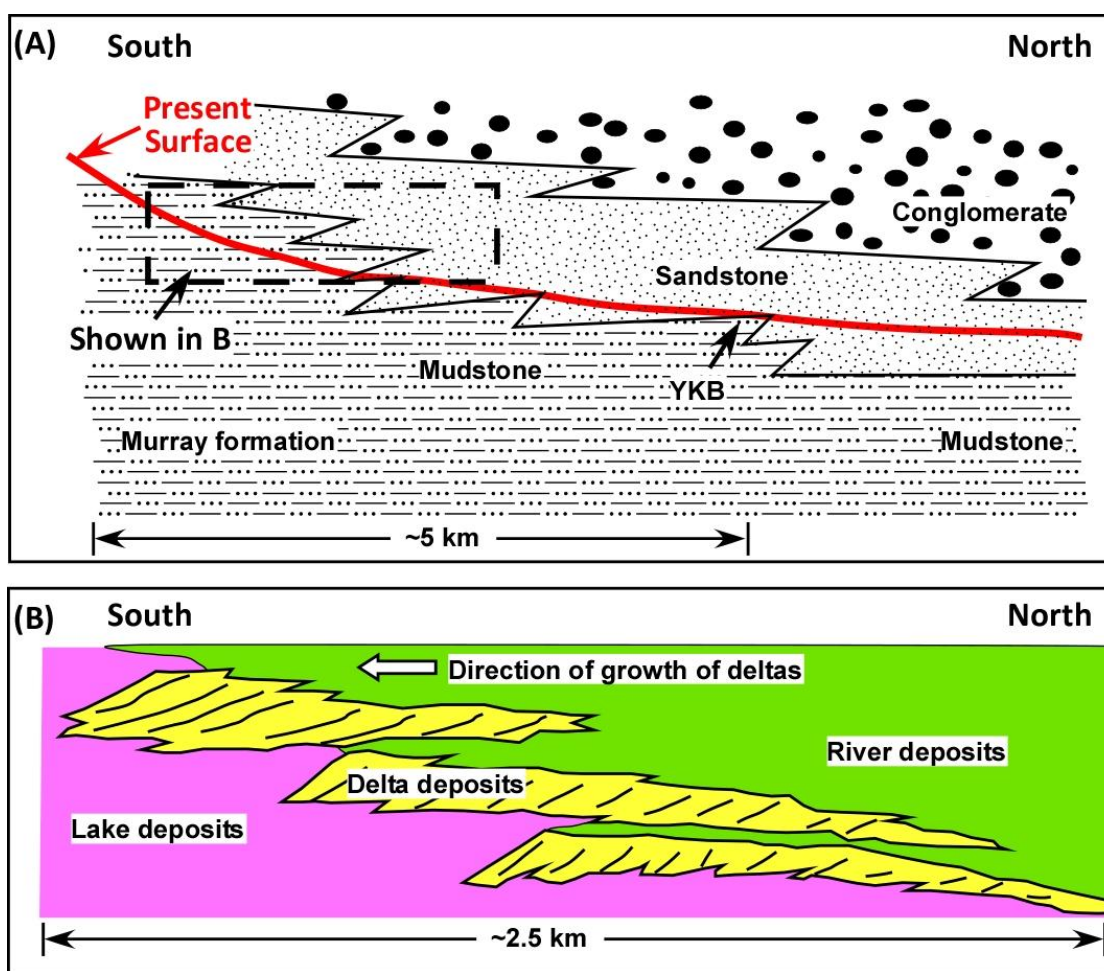

Supplemental Figure 9. Schematic drawing shows the existing fluvial-deltaic-lacustrine interpretation of strata examined by the Curiosity rover (modified from Grotzinger et al., 2015). The proposed model involved four rock units: the Hummocky Plains Unit (HPU), the Striated Unit (SU), the Rugged Terrain Unit (RTU), and the Murray formation (MF). (A) Schematic drawing represents north to south facies transition from conglomerate to mudstone exposed along the path of the Curiosity rover. These lithofacies were

22 considered time equivalent, that is, formed side-by-side at the same time. They  
23 migrated southward through time. These authors concluded all four rock units (the HPU,  
24 the SU, the RTU, and the MF) deposited when Gale crater was initially being filled. After  
25 the lake dried up, these rock units were buried by 5 km of sediments that filled the  
26 crater. Subsequent erosion at the margins of Gale crater resulted in the emergence of  
27 Mt. Sharp. It also formed the present-day exposure pattern of strata examined by the  
28 Curiosity rover. This erosion surface is marked by a thick red line. According to this  
29 scenario, all four rock units examined by the Curiosity rover pre-dated the emergence of  
30 Mt. Sharp. YKB: Yellowknife Bay. **(B)** Schematic diagram shows proposed depositional  
31 environments of lithofacies shown in A. It suggests alluvially-deposited sediments on  
32 the northern areas of the rover path transitioned southward into fluvial sandstone, then  
33 to deltaic sandstone, and finally to lacustrine mudstone. In this interpretation, The  
34 Striated Unit formed a series of small deltas that migrated southward due to rises in lake  
35 level. The original Figure was in black and white. For clarity, we colored the lithofacies  
36 to match those in Figure 1C of the manuscript.

37  
38  
39

#### 40 **Reference**

41  
42  
43  
44  
45

Grotzinger, J. P. et al. 2015. Deposition, exhumation, and paleoclimate of an ancient lake deposit, Gale crater, Mars. *Science*, **350**; doi:10.1126/science.aac7575 (2015).
